# Supplementary material for: The Gut-Ex-Vivo System (GEVS) Is a Dynamic and Versatile Tool for the Study of DNBS-Induced IBD in BALB/C and C57BL/6 Mice, Highlighting the Protective Role of Probiotics
Source: MDPI journal article supplement (doi:10.3390/biology11111574), 2022-10-27
Supplement: s1 [file s1]

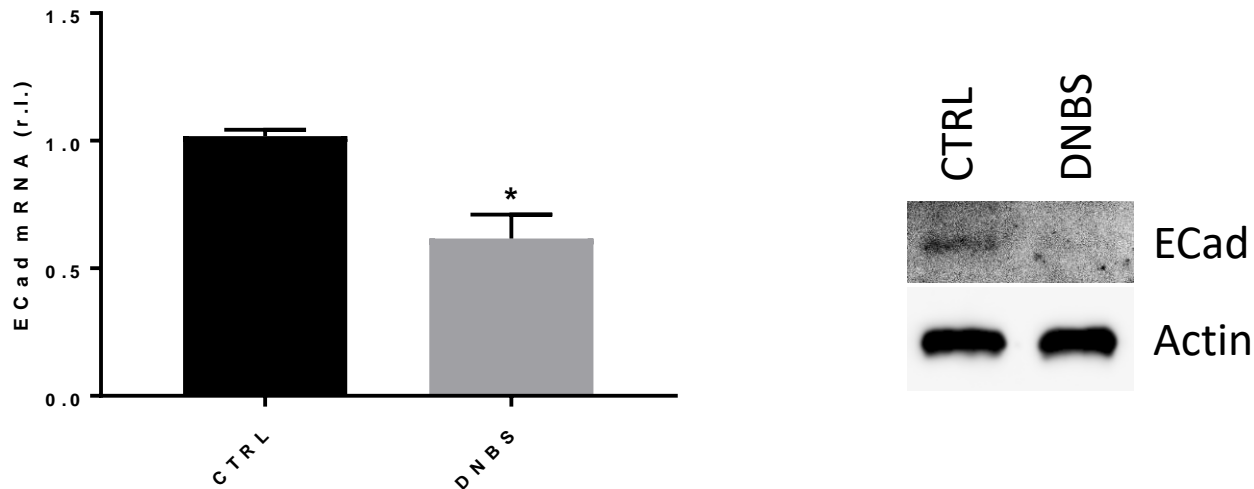

**Figure S1. E-Cadherin expression modulation by DNBS.** Colon from C57BL/6 mice were untreated (CTRL) or exposed to DNBS (1,5mg/ml; B) for 5h, in GEVS, and the expression of E-Cadherin was evaluated by both RT-qPCR (A) and western blotting (B) analysis. Actin was used as loading control. Data are representative of experiments performed three times, in triplicate. Histograms are representative of mean  $\pm$  standard deviation; \*  $p < 0,05$ .

A

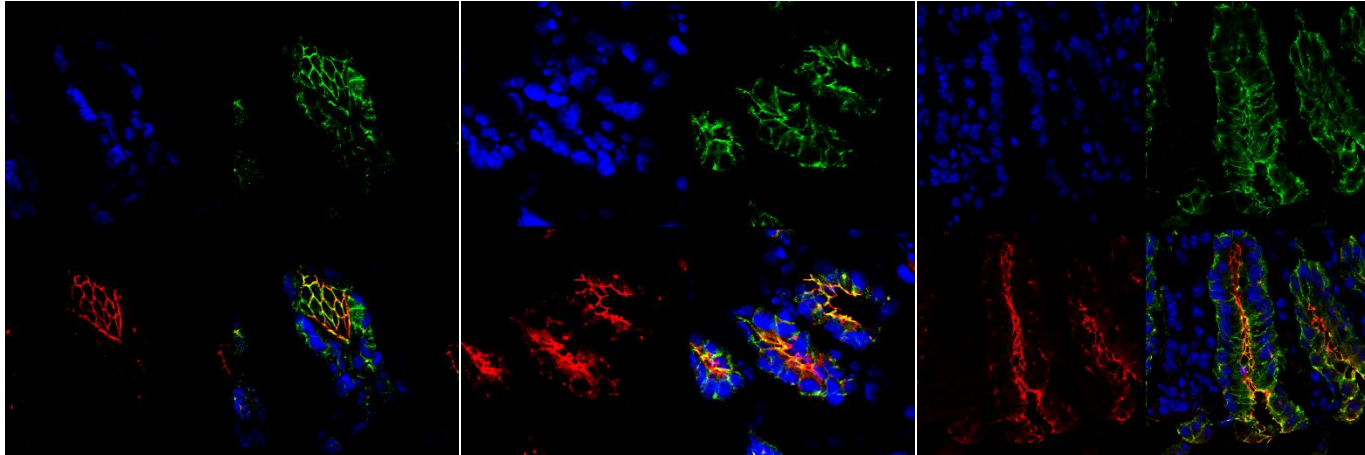

B

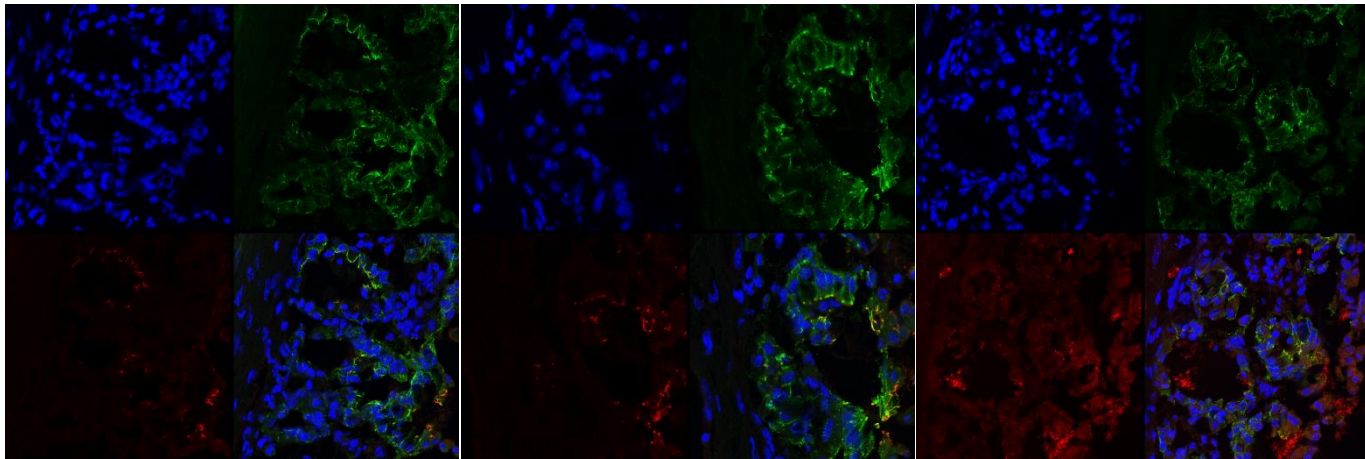

**Figure S2. TJ dysregulation by DNBS.** Colon from C57BL/6 mice were untreated (A) or exposed to DNBS (1,5mg/ml; B) for 5h, in GEVS. Tissue distribution of TJs was evaluated analyzing the localization of ZO-1 (red). Epithelial cells were evidenced by the expression of E-Cadherin (green), while cell nuclei were evidenced by DAPI (blue) staining.
